# Supplementary material for: Assessment of genetic diversity among native Algerian rabbit populations using microsatellite markers
Source: Copernicus journal article supplement (doi:10.5194/aab-66-207-2023), 2023-07-27
Supplement: Supplementary file [file aab-66-207-2023-supplement.pdf]

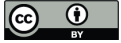

*Supplement of*

## **Assessment of genetic diversity among native Algerian rabbit populations using microsatellite markers**

**Abdelbaki Bouhali et al.**

*Correspondence to:* Abdelbaki Bouhali (bouhali.abdelbaki@gmail.com, a.bouhali@ens-lagh.dz)

The copyright of individual parts of the supplement might differ from the article licence.

Table S 1. Loci, and PCR reactions used in this study

| Multiplex     | Loci          | PCR reactions                                                                                                                                                                                                                                                                                                                                                                                                                                                                                                                                                   |             |      |                  |                  |      |      |       |      |      |      |      |      |      |       |      |      |      |       |      |      |        |      |      |      |      |     |        |  |    |  |  |     |  |  |    |  |  |  |
|---------------|---------------|-----------------------------------------------------------------------------------------------------------------------------------------------------------------------------------------------------------------------------------------------------------------------------------------------------------------------------------------------------------------------------------------------------------------------------------------------------------------------------------------------------------------------------------------------------------------|-------------|------|------------------|------------------|------|------|-------|------|------|------|------|------|------|-------|------|------|------|-------|------|------|--------|------|------|------|------|-----|--------|--|----|--|--|-----|--|--|----|--|--|--|
| 1             | INRACCDDV0108 | <table border="1"> <tr> <td>Temperature</td> <td>95</td> <td>95</td> <td>63 - 55<br/>(↓10)</td> <td>72</td> <td>95</td> <td>55</td> <td>72</td> <td>60</td> <td>10</td> </tr> <tr> <td>Time</td> <td>15 m</td> <td>30 s</td> <td>1 min</td> <td>45 s</td> <td>30 s</td> <td>30 s</td> <td>45 s</td> <td>20 m</td> <td>∞</td> </tr> <tr> <td>Cycles</td> <td></td> <td colspan="3">9x</td> <td colspan="3">38x</td> <td></td> <td></td> </tr> </table>                                                                                                           | Temperature | 95   | 95               | 63 - 55<br>(↓10) | 72   | 95   | 55    | 72   | 60   | 10   | Time | 15 m | 30 s | 1 min | 45 s | 30 s | 30 s | 45 s  | 20 m | ∞    | Cycles |      | 9x   |      |      | 38x |        |  |    |  |  |     |  |  |    |  |  |  |
|               | Temperature   |                                                                                                                                                                                                                                                                                                                                                                                                                                                                                                                                                                 | 95          | 95   | 63 - 55<br>(↓10) | 72               | 95   | 55   | 72    | 60   | 10   |      |      |      |      |       |      |      |      |       |      |      |        |      |      |      |      |     |        |  |    |  |  |     |  |  |    |  |  |  |
|               | Time          |                                                                                                                                                                                                                                                                                                                                                                                                                                                                                                                                                                 | 15 m        | 30 s | 1 min            | 45 s             | 30 s | 30 s | 45 s  | 20 m | ∞    |      |      |      |      |       |      |      |      |       |      |      |        |      |      |      |      |     |        |  |    |  |  |     |  |  |    |  |  |  |
|               | Cycles        |                                                                                                                                                                                                                                                                                                                                                                                                                                                                                                                                                                 |             | 9x   |                  |                  | 38x  |      |       |      |      |      |      |      |      |       |      |      |      |       |      |      |        |      |      |      |      |     |        |  |    |  |  |     |  |  |    |  |  |  |
|               | INRACCDDV0172 |                                                                                                                                                                                                                                                                                                                                                                                                                                                                                                                                                                 |             |      |                  |                  |      |      |       |      |      |      |      |      |      |       |      |      |      |       |      |      |        |      |      |      |      |     |        |  |    |  |  |     |  |  |    |  |  |  |
|               | INRACCDDV0176 |                                                                                                                                                                                                                                                                                                                                                                                                                                                                                                                                                                 |             |      |                  |                  |      |      |       |      |      |      |      |      |      |       |      |      |      |       |      |      |        |      |      |      |      |     |        |  |    |  |  |     |  |  |    |  |  |  |
|               | INRACCDDV0106 |                                                                                                                                                                                                                                                                                                                                                                                                                                                                                                                                                                 |             |      |                  |                  |      |      |       |      |      |      |      |      |      |       |      |      |      |       |      |      |        |      |      |      |      |     |        |  |    |  |  |     |  |  |    |  |  |  |
|               | INRACCDDV0139 |                                                                                                                                                                                                                                                                                                                                                                                                                                                                                                                                                                 |             |      |                  |                  |      |      |       |      |      |      |      |      |      |       |      |      |      |       |      |      |        |      |      |      |      |     |        |  |    |  |  |     |  |  |    |  |  |  |
| INRACCDDV0101 |               |                                                                                                                                                                                                                                                                                                                                                                                                                                                                                                                                                                 |             |      |                  |                  |      |      |       |      |      |      |      |      |      |       |      |      |      |       |      |      |        |      |      |      |      |     |        |  |    |  |  |     |  |  |    |  |  |  |
| INRACCDDV0203 |               |                                                                                                                                                                                                                                                                                                                                                                                                                                                                                                                                                                 |             |      |                  |                  |      |      |       |      |      |      |      |      |      |       |      |      |      |       |      |      |        |      |      |      |      |     |        |  |    |  |  |     |  |  |    |  |  |  |
| INRACCDDV0016 |               |                                                                                                                                                                                                                                                                                                                                                                                                                                                                                                                                                                 |             |      |                  |                  |      |      |       |      |      |      |      |      |      |       |      |      |      |       |      |      |        |      |      |      |      |     |        |  |    |  |  |     |  |  |    |  |  |  |
| 2             | INRACCDDV0089 | <table border="1"> <tr> <td>Temperature</td> <td>95</td> <td>95</td> <td>61 - 55<br/>(↓10)</td> <td>72</td> <td>95</td> <td>55</td> <td>72</td> <td>60</td> <td>10</td> </tr> <tr> <td>Time</td> <td>15 m</td> <td>30 s</td> <td>45 s</td> <td>45 s</td> <td>30 s</td> <td>45 s</td> <td>1 min</td> <td>20 m</td> <td>∞</td> </tr> <tr> <td>Cycles</td> <td></td> <td colspan="3">7x</td> <td colspan="3">37x</td> <td></td> <td></td> </tr> </table>                                                                                                           | Temperature | 95   | 95               | 61 - 55<br>(↓10) | 72   | 95   | 55    | 72   | 60   | 10   | Time | 15 m | 30 s | 45 s  | 45 s | 30 s | 45 s | 1 min | 20 m | ∞    | Cycles |      | 7x   |      |      | 37x |        |  |    |  |  |     |  |  |    |  |  |  |
|               | Temperature   |                                                                                                                                                                                                                                                                                                                                                                                                                                                                                                                                                                 | 95          | 95   | 61 - 55<br>(↓10) | 72               | 95   | 55   | 72    | 60   | 10   |      |      |      |      |       |      |      |      |       |      |      |        |      |      |      |      |     |        |  |    |  |  |     |  |  |    |  |  |  |
|               | Time          |                                                                                                                                                                                                                                                                                                                                                                                                                                                                                                                                                                 | 15 m        | 30 s | 45 s             | 45 s             | 30 s | 45 s | 1 min | 20 m | ∞    |      |      |      |      |       |      |      |      |       |      |      |        |      |      |      |      |     |        |  |    |  |  |     |  |  |    |  |  |  |
|               | Cycles        |                                                                                                                                                                                                                                                                                                                                                                                                                                                                                                                                                                 |             | 7x   |                  |                  | 37x  |      |       |      |      |      |      |      |      |       |      |      |      |       |      |      |        |      |      |      |      |     |        |  |    |  |  |     |  |  |    |  |  |  |
|               | INRACCDDV0140 |                                                                                                                                                                                                                                                                                                                                                                                                                                                                                                                                                                 |             |      |                  |                  |      |      |       |      |      |      |      |      |      |       |      |      |      |       |      |      |        |      |      |      |      |     |        |  |    |  |  |     |  |  |    |  |  |  |
|               | INRACCDDV0087 |                                                                                                                                                                                                                                                                                                                                                                                                                                                                                                                                                                 |             |      |                  |                  |      |      |       |      |      |      |      |      |      |       |      |      |      |       |      |      |        |      |      |      |      |     |        |  |    |  |  |     |  |  |    |  |  |  |
| INRACCDDV0157 |               |                                                                                                                                                                                                                                                                                                                                                                                                                                                                                                                                                                 |             |      |                  |                  |      |      |       |      |      |      |      |      |      |       |      |      |      |       |      |      |        |      |      |      |      |     |        |  |    |  |  |     |  |  |    |  |  |  |
| INRACCDDV0119 |               |                                                                                                                                                                                                                                                                                                                                                                                                                                                                                                                                                                 |             |      |                  |                  |      |      |       |      |      |      |      |      |      |       |      |      |      |       |      |      |        |      |      |      |      |     |        |  |    |  |  |     |  |  |    |  |  |  |
| INRACCDDV0201 |               |                                                                                                                                                                                                                                                                                                                                                                                                                                                                                                                                                                 |             |      |                  |                  |      |      |       |      |      |      |      |      |      |       |      |      |      |       |      |      |        |      |      |      |      |     |        |  |    |  |  |     |  |  |    |  |  |  |
| 3             | SAT 3         | <table border="1"> <tr> <td>Temperature</td> <td>95</td> <td>95</td> <td>60</td> <td>72</td> <td>95</td> <td>53</td> <td>72</td> <td>60</td> <td>10</td> </tr> <tr> <td>Time</td> <td>15 m</td> <td>30 s</td> <td>30 s</td> <td>45 s</td> <td>30 s</td> <td>30 s</td> <td>45 s</td> <td>20 m</td> <td>∞</td> </tr> <tr> <td>Cycles</td> <td></td> <td colspan="3">38 x</td> <td colspan="3">7 x</td> <td></td> <td></td> </tr> </table>                                                                                                                         | Temperature | 95   | 95               | 60               | 72   | 95   | 53    | 72   | 60   | 10   | Time | 15 m | 30 s | 30 s  | 45 s | 30 s | 30 s | 45 s  | 20 m | ∞    | Cycles |      | 38 x |      |      | 7 x |        |  |    |  |  |     |  |  |    |  |  |  |
|               | Temperature   |                                                                                                                                                                                                                                                                                                                                                                                                                                                                                                                                                                 | 95          | 95   | 60               | 72               | 95   | 53   | 72    | 60   | 10   |      |      |      |      |       |      |      |      |       |      |      |        |      |      |      |      |     |        |  |    |  |  |     |  |  |    |  |  |  |
|               | Time          |                                                                                                                                                                                                                                                                                                                                                                                                                                                                                                                                                                 | 15 m        | 30 s | 30 s             | 45 s             | 30 s | 30 s | 45 s  | 20 m | ∞    |      |      |      |      |       |      |      |      |       |      |      |        |      |      |      |      |     |        |  |    |  |  |     |  |  |    |  |  |  |
|               | Cycles        |                                                                                                                                                                                                                                                                                                                                                                                                                                                                                                                                                                 |             | 38 x |                  |                  | 7 x  |      |       |      |      |      |      |      |      |       |      |      |      |       |      |      |        |      |      |      |      |     |        |  |    |  |  |     |  |  |    |  |  |  |
|               | SAT 4         |                                                                                                                                                                                                                                                                                                                                                                                                                                                                                                                                                                 |             |      |                  |                  |      |      |       |      |      |      |      |      |      |       |      |      |      |       |      |      |        |      |      |      |      |     |        |  |    |  |  |     |  |  |    |  |  |  |
| SAT 5         |               |                                                                                                                                                                                                                                                                                                                                                                                                                                                                                                                                                                 |             |      |                  |                  |      |      |       |      |      |      |      |      |      |       |      |      |      |       |      |      |        |      |      |      |      |     |        |  |    |  |  |     |  |  |    |  |  |  |
| SAT 8         |               |                                                                                                                                                                                                                                                                                                                                                                                                                                                                                                                                                                 |             |      |                  |                  |      |      |       |      |      |      |      |      |      |       |      |      |      |       |      |      |        |      |      |      |      |     |        |  |    |  |  |     |  |  |    |  |  |  |
| SAT 7         |               |                                                                                                                                                                                                                                                                                                                                                                                                                                                                                                                                                                 |             |      |                  |                  |      |      |       |      |      |      |      |      |      |       |      |      |      |       |      |      |        |      |      |      |      |     |        |  |    |  |  |     |  |  |    |  |  |  |
| 4             | INRACCDDV0102 | <p>Tcof1GH</p> <table border="1"> <tr> <td>Temperature</td> <td>95</td> <td>95</td> <td>59 - 54<br/>(↓10)</td> <td>72</td> <td>95</td> <td>54</td> <td>72</td> <td>95</td> <td>53</td> <td>72</td> <td>60</td> <td>10</td> </tr> <tr> <td>Time</td> <td>15 m</td> <td>30 s</td> <td>30 s</td> <td>30 s</td> <td>30 s</td> <td>45 s</td> <td>45 s</td> <td>30 s</td> <td>30 s</td> <td>45 s</td> <td>20 m</td> <td>∞</td> </tr> <tr> <td>Cycles</td> <td></td> <td colspan="3">6x</td> <td colspan="3">29x</td> <td colspan="3">8x</td> <td></td> </tr> </table> | Temperature | 95   | 95               | 59 - 54<br>(↓10) | 72   | 95   | 54    | 72   | 95   | 53   | 72   | 60   | 10   | Time  | 15 m | 30 s | 30 s | 30 s  | 30 s | 45 s | 45 s   | 30 s | 30 s | 45 s | 20 m | ∞   | Cycles |  | 6x |  |  | 29x |  |  | 8x |  |  |  |
|               | Temperature   |                                                                                                                                                                                                                                                                                                                                                                                                                                                                                                                                                                 | 95          | 95   | 59 - 54<br>(↓10) | 72               | 95   | 54   | 72    | 95   | 53   | 72   | 60   | 10   |      |       |      |      |      |       |      |      |        |      |      |      |      |     |        |  |    |  |  |     |  |  |    |  |  |  |
|               | Time          |                                                                                                                                                                                                                                                                                                                                                                                                                                                                                                                                                                 | 15 m        | 30 s | 30 s             | 30 s             | 30 s | 45 s | 45 s  | 30 s | 30 s | 45 s | 20 m | ∞    |      |       |      |      |      |       |      |      |        |      |      |      |      |     |        |  |    |  |  |     |  |  |    |  |  |  |
|               | Cycles        |                                                                                                                                                                                                                                                                                                                                                                                                                                                                                                                                                                 |             | 6x   |                  |                  | 29x  |      |       | 8x   |      |      |      |      |      |       |      |      |      |       |      |      |        |      |      |      |      |     |        |  |    |  |  |     |  |  |    |  |  |  |
|               | SAT13         |                                                                                                                                                                                                                                                                                                                                                                                                                                                                                                                                                                 |             |      |                  |                  |      |      |       |      |      |      |      |      |      |       |      |      |      |       |      |      |        |      |      |      |      |     |        |  |    |  |  |     |  |  |    |  |  |  |
|               | INRACCDDV0169 |                                                                                                                                                                                                                                                                                                                                                                                                                                                                                                                                                                 |             |      |                  |                  |      |      |       |      |      |      |      |      |      |       |      |      |      |       |      |      |        |      |      |      |      |     |        |  |    |  |  |     |  |  |    |  |  |  |
|               | INRACCDDV0104 |                                                                                                                                                                                                                                                                                                                                                                                                                                                                                                                                                                 |             |      |                  |                  |      |      |       |      |      |      |      |      |      |       |      |      |      |       |      |      |        |      |      |      |      |     |        |  |    |  |  |     |  |  |    |  |  |  |
| INRACCDDV0205 |               |                                                                                                                                                                                                                                                                                                                                                                                                                                                                                                                                                                 |             |      |                  |                  |      |      |       |      |      |      |      |      |      |       |      |      |      |       |      |      |        |      |      |      |      |     |        |  |    |  |  |     |  |  |    |  |  |  |
| INRACCDDV0228 |               |                                                                                                                                                                                                                                                                                                                                                                                                                                                                                                                                                                 |             |      |                  |                  |      |      |       |      |      |      |      |      |      |       |      |      |      |       |      |      |        |      |      |      |      |     |        |  |    |  |  |     |  |  |    |  |  |  |
| INRACCDDV0192 |               |                                                                                                                                                                                                                                                                                                                                                                                                                                                                                                                                                                 |             |      |                  |                  |      |      |       |      |      |      |      |      |      |       |      |      |      |       |      |      |        |      |      |      |      |     |        |  |    |  |  |     |  |  |    |  |  |  |
| 5             | INRACCDDV0313 | <table border="1"> <tr> <td>Temperature</td> <td>95</td> <td>95</td> <td>63 - 56<br/>(↓10)</td> <td>72</td> <td>95</td> <td>56</td> <td>72</td> <td>60</td> <td>10</td> </tr> <tr> <td>Time</td> <td>15 m</td> <td>30 s</td> <td>45 s</td> <td>45 s</td> <td>30 s</td> <td>30 s</td> <td>45 s</td> <td>20 m</td> <td>∞</td> </tr> <tr> <td>Cycles</td> <td></td> <td colspan="3">8x</td> <td colspan="3">38x</td> <td></td> <td></td> </tr> </table>                                                                                                            | Temperature | 95   | 95               | 63 - 56<br>(↓10) | 72   | 95   | 56    | 72   | 60   | 10   | Time | 15 m | 30 s | 45 s  | 45 s | 30 s | 30 s | 45 s  | 20 m | ∞    | Cycles |      | 8x   |      |      | 38x |        |  |    |  |  |     |  |  |    |  |  |  |
|               | Temperature   |                                                                                                                                                                                                                                                                                                                                                                                                                                                                                                                                                                 | 95          | 95   | 63 - 56<br>(↓10) | 72               | 95   | 56   | 72    | 60   | 10   |      |      |      |      |       |      |      |      |       |      |      |        |      |      |      |      |     |        |  |    |  |  |     |  |  |    |  |  |  |
|               | Time          |                                                                                                                                                                                                                                                                                                                                                                                                                                                                                                                                                                 | 15 m        | 30 s | 45 s             | 45 s             | 30 s | 30 s | 45 s  | 20 m | ∞    |      |      |      |      |       |      |      |      |       |      |      |        |      |      |      |      |     |        |  |    |  |  |     |  |  |    |  |  |  |
|               | Cycles        |                                                                                                                                                                                                                                                                                                                                                                                                                                                                                                                                                                 |             | 8x   |                  |                  | 38x  |      |       |      |      |      |      |      |      |       |      |      |      |       |      |      |        |      |      |      |      |     |        |  |    |  |  |     |  |  |    |  |  |  |
|               | INRACCDDV0182 |                                                                                                                                                                                                                                                                                                                                                                                                                                                                                                                                                                 |             |      |                  |                  |      |      |       |      |      |      |      |      |      |       |      |      |      |       |      |      |        |      |      |      |      |     |        |  |    |  |  |     |  |  |    |  |  |  |
| INRACCDDV0040 |               |                                                                                                                                                                                                                                                                                                                                                                                                                                                                                                                                                                 |             |      |                  |                  |      |      |       |      |      |      |      |      |      |       |      |      |      |       |      |      |        |      |      |      |      |     |        |  |    |  |  |     |  |  |    |  |  |  |
| INRACCDDV0185 |               |                                                                                                                                                                                                                                                                                                                                                                                                                                                                                                                                                                 |             |      |                  |                  |      |      |       |      |      |      |      |      |      |       |      |      |      |       |      |      |        |      |      |      |      |     |        |  |    |  |  |     |  |  |    |  |  |  |
| INRACCDDV0259 |               |                                                                                                                                                                                                                                                                                                                                                                                                                                                                                                                                                                 |             |      |                  |                  |      |      |       |      |      |      |      |      |      |       |      |      |      |       |      |      |        |      |      |      |      |     |        |  |    |  |  |     |  |  |    |  |  |  |

|              |                    |                                                                                                                                                                                                                                                                                                                                                                                                                                                                                                                                                                       |                    |      |                  |                  |      |      |      |      |      |      |             |      |      |               |      |      |      |      |      |      |               |      |      |      |      |     |               |  |    |  |  |     |  |  |    |  |  |  |
|--------------|--------------------|-----------------------------------------------------------------------------------------------------------------------------------------------------------------------------------------------------------------------------------------------------------------------------------------------------------------------------------------------------------------------------------------------------------------------------------------------------------------------------------------------------------------------------------------------------------------------|--------------------|------|------------------|------------------|------|------|------|------|------|------|-------------|------|------|---------------|------|------|------|------|------|------|---------------|------|------|------|------|-----|---------------|--|----|--|--|-----|--|--|----|--|--|--|
| <b>6</b>     | KLH13              | <table border="1"> <tr> <td><b>Temperature</b></td> <td>95</td> <td>95</td> <td>66 - 62<br/>(↓10)</td> <td>72</td> <td>95</td> <td>62</td> <td>72</td> <td>60</td> <td>10</td> </tr> <tr> <td><b>Time</b></td> <td>15 m</td> <td>30 s</td> <td>45 s</td> <td>45 s</td> <td>30 s</td> <td>30 s</td> <td>45 s</td> <td>20 m</td> <td>∞</td> </tr> <tr> <td><b>Cycles</b></td> <td></td> <td colspan="3">5x</td> <td colspan="3">38x</td> <td></td> <td></td> </tr> </table>                                                                                             | <b>Temperature</b> | 95   | 95               | 66 - 62<br>(↓10) | 72   | 95   | 62   | 72   | 60   | 10   | <b>Time</b> | 15 m | 30 s | 45 s          | 45 s | 30 s | 30 s | 45 s | 20 m | ∞    | <b>Cycles</b> |      | 5x   |      |      | 38x |               |  |    |  |  |     |  |  |    |  |  |  |
|              | <b>Temperature</b> |                                                                                                                                                                                                                                                                                                                                                                                                                                                                                                                                                                       | 95                 | 95   | 66 - 62<br>(↓10) | 72               | 95   | 62   | 72   | 60   | 10   |      |             |      |      |               |      |      |      |      |      |      |               |      |      |      |      |     |               |  |    |  |  |     |  |  |    |  |  |  |
|              | <b>Time</b>        |                                                                                                                                                                                                                                                                                                                                                                                                                                                                                                                                                                       | 15 m               | 30 s | 45 s             | 45 s             | 30 s | 30 s | 45 s | 20 m | ∞    |      |             |      |      |               |      |      |      |      |      |      |               |      |      |      |      |     |               |  |    |  |  |     |  |  |    |  |  |  |
|              | <b>Cycles</b>      |                                                                                                                                                                                                                                                                                                                                                                                                                                                                                                                                                                       |                    | 5x   |                  |                  | 38x  |      |      |      |      |      |             |      |      |               |      |      |      |      |      |      |               |      |      |      |      |     |               |  |    |  |  |     |  |  |    |  |  |  |
| PROC         |                    |                                                                                                                                                                                                                                                                                                                                                                                                                                                                                                                                                                       |                    |      |                  |                  |      |      |      |      |      |      |             |      |      |               |      |      |      |      |      |      |               |      |      |      |      |     |               |  |    |  |  |     |  |  |    |  |  |  |
| EDNRA        |                    |                                                                                                                                                                                                                                                                                                                                                                                                                                                                                                                                                                       |                    |      |                  |                  |      |      |      |      |      |      |             |      |      |               |      |      |      |      |      |      |               |      |      |      |      |     |               |  |    |  |  |     |  |  |    |  |  |  |
| GPR64        |                    |                                                                                                                                                                                                                                                                                                                                                                                                                                                                                                                                                                       |                    |      |                  |                  |      |      |      |      |      |      |             |      |      |               |      |      |      |      |      |      |               |      |      |      |      |     |               |  |    |  |  |     |  |  |    |  |  |  |
| <b>7</b>     | CYTC               | <table border="1"> <tr> <td><b>Temperature</b></td> <td>95</td> <td>95</td> <td>67 - 60<br/>(↓10)</td> <td>72</td> <td>95</td> <td>60</td> <td>72</td> <td>95</td> <td>53</td> <td>72</td> <td>60</td> <td>10</td> </tr> <tr> <td><b>Time</b></td> <td>15 m</td> <td>30 s</td> <td>30 s</td> <td>45 s</td> <td>30 s</td> <td>30 s</td> <td>45 s</td> <td>30 s</td> <td>30 s</td> <td>45 s</td> <td>20 m</td> <td>∞</td> </tr> <tr> <td><b>Cycles</b></td> <td></td> <td colspan="3">8x</td> <td colspan="3">30x</td> <td colspan="3">8x</td> <td></td> </tr> </table> | <b>Temperature</b> | 95   | 95               | 67 - 60<br>(↓10) | 72   | 95   | 60   | 72   | 95   | 53   | 72          | 60   | 10   | <b>Time</b>   | 15 m | 30 s | 30 s | 45 s | 30 s | 30 s | 45 s          | 30 s | 30 s | 45 s | 20 m | ∞   | <b>Cycles</b> |  | 8x |  |  | 30x |  |  | 8x |  |  |  |
|              | <b>Temperature</b> |                                                                                                                                                                                                                                                                                                                                                                                                                                                                                                                                                                       | 95                 | 95   | 67 - 60<br>(↓10) | 72               | 95   | 60   | 72   | 95   | 53   | 72   | 60          | 10   |      |               |      |      |      |      |      |      |               |      |      |      |      |     |               |  |    |  |  |     |  |  |    |  |  |  |
|              | <b>Time</b>        |                                                                                                                                                                                                                                                                                                                                                                                                                                                                                                                                                                       | 15 m               | 30 s | 30 s             | 45 s             | 30 s | 30 s | 45 s | 30 s | 30 s | 45 s | 20 m        | ∞    |      |               |      |      |      |      |      |      |               |      |      |      |      |     |               |  |    |  |  |     |  |  |    |  |  |  |
|              | <b>Cycles</b>      |                                                                                                                                                                                                                                                                                                                                                                                                                                                                                                                                                                       |                    | 8x   |                  |                  | 30x  |      |      | 8x   |      |      |             |      |      |               |      |      |      |      |      |      |               |      |      |      |      |     |               |  |    |  |  |     |  |  |    |  |  |  |
| ARH          |                    |                                                                                                                                                                                                                                                                                                                                                                                                                                                                                                                                                                       |                    |      |                  |                  |      |      |      |      |      |      |             |      |      |               |      |      |      |      |      |      |               |      |      |      |      |     |               |  |    |  |  |     |  |  |    |  |  |  |
| HPRT         |                    |                                                                                                                                                                                                                                                                                                                                                                                                                                                                                                                                                                       |                    |      |                  |                  |      |      |      |      |      |      |             |      |      |               |      |      |      |      |      |      |               |      |      |      |      |     |               |  |    |  |  |     |  |  |    |  |  |  |
| INRACDDV0342 |                    |                                                                                                                                                                                                                                                                                                                                                                                                                                                                                                                                                                       |                    |      |                  |                  |      |      |      |      |      |      |             |      |      |               |      |      |      |      |      |      |               |      |      |      |      |     |               |  |    |  |  |     |  |  |    |  |  |  |
| <b>8</b>     | BCDO2              | <table border="1"> <tr> <td><b>Temperature</b></td> <td>95</td> <td>95</td> <td>63 - 56<br/>(↓10)</td> <td>72</td> <td>95</td> <td>56</td> <td>72</td> <td>60</td> <td>10</td> </tr> <tr> <td><b>Time</b></td> <td>15 m</td> <td>30 s</td> <td>45 s</td> <td>45 s</td> <td>30 s</td> <td>45 s</td> <td>45 s</td> <td>20 m</td> <td>∞</td> </tr> <tr> <td><b>Cycles</b></td> <td></td> <td colspan="3">9x</td> <td colspan="3">31x</td> <td></td> <td></td> </tr> </table>                                                                                             | <b>Temperature</b> | 95   | 95               | 63 - 56<br>(↓10) | 72   | 95   | 56   | 72   | 60   | 10   | <b>Time</b> | 15 m | 30 s | 45 s          | 45 s | 30 s | 45 s | 45 s | 20 m | ∞    | <b>Cycles</b> |      | 9x   |      |      | 31x |               |  |    |  |  |     |  |  |    |  |  |  |
|              | <b>Temperature</b> |                                                                                                                                                                                                                                                                                                                                                                                                                                                                                                                                                                       | 95                 | 95   | 63 - 56<br>(↓10) | 72               | 95   | 56   | 72   | 60   | 10   |      |             |      |      |               |      |      |      |      |      |      |               |      |      |      |      |     |               |  |    |  |  |     |  |  |    |  |  |  |
|              | <b>Time</b>        |                                                                                                                                                                                                                                                                                                                                                                                                                                                                                                                                                                       | 15 m               | 30 s | 45 s             | 45 s             | 30 s | 45 s | 45 s | 20 m | ∞    |      |             |      |      |               |      |      |      |      |      |      |               |      |      |      |      |     |               |  |    |  |  |     |  |  |    |  |  |  |
|              | <b>Cycles</b>      |                                                                                                                                                                                                                                                                                                                                                                                                                                                                                                                                                                       |                    | 9x   |                  |                  | 31x  |      |      |      |      |      |             |      |      |               |      |      |      |      |      |      |               |      |      |      |      |     |               |  |    |  |  |     |  |  |    |  |  |  |
|              | TYR                |                                                                                                                                                                                                                                                                                                                                                                                                                                                                                                                                                                       |                    |      |                  |                  |      |      |      |      |      |      |             |      |      |               |      |      |      |      |      |      |               |      |      |      |      |     |               |  |    |  |  |     |  |  |    |  |  |  |
|              | GPC4               |                                                                                                                                                                                                                                                                                                                                                                                                                                                                                                                                                                       |                    |      |                  |                  |      |      |      |      |      |      |             |      |      |               |      |      |      |      |      |      |               |      |      |      |      |     |               |  |    |  |  |     |  |  |    |  |  |  |
|              | MSTN               |                                                                                                                                                                                                                                                                                                                                                                                                                                                                                                                                                                       |                    |      |                  |                  |      |      |      |      |      |      |             |      |      |               |      |      |      |      |      |      |               |      |      |      |      |     |               |  |    |  |  |     |  |  |    |  |  |  |
|              | IGF1               |                                                                                                                                                                                                                                                                                                                                                                                                                                                                                                                                                                       |                    |      |                  |                  |      |      |      |      |      |      |             |      |      |               |      |      |      |      |      |      |               |      |      |      |      |     |               |  |    |  |  |     |  |  |    |  |  |  |
|              | FGF5               |                                                                                                                                                                                                                                                                                                                                                                                                                                                                                                                                                                       |                    |      |                  |                  |      |      |      |      |      |      |             |      |      |               |      |      |      |      |      |      |               |      |      |      |      |     |               |  |    |  |  |     |  |  |    |  |  |  |
| SOX9         |                    |                                                                                                                                                                                                                                                                                                                                                                                                                                                                                                                                                                       |                    |      |                  |                  |      |      |      |      |      |      |             |      |      |               |      |      |      |      |      |      |               |      |      |      |      |     |               |  |    |  |  |     |  |  |    |  |  |  |
| GHRH         |                    |                                                                                                                                                                                                                                                                                                                                                                                                                                                                                                                                                                       |                    |      |                  |                  |      |      |      |      |      |      |             |      |      |               |      |      |      |      |      |      |               |      |      |      |      |     |               |  |    |  |  |     |  |  |    |  |  |  |
| GH           |                    |                                                                                                                                                                                                                                                                                                                                                                                                                                                                                                                                                                       |                    |      |                  |                  |      |      |      |      |      |      |             |      |      |               |      |      |      |      |      |      |               |      |      |      |      |     |               |  |    |  |  |     |  |  |    |  |  |  |
| IGF1R        |                    |                                                                                                                                                                                                                                                                                                                                                                                                                                                                                                                                                                       |                    |      |                  |                  |      |      |      |      |      |      |             |      |      |               |      |      |      |      |      |      |               |      |      |      |      |     |               |  |    |  |  |     |  |  |    |  |  |  |
| <b>9</b>     | BDNF               | <table border="1"> <tr> <td><b>Temperature</b></td> <td>95</td> <td>95</td> <td>65 - 58<br/>(↓10)</td> <td>72</td> <td>95</td> <td>58</td> <td>72</td> <td>95</td> <td>53</td> <td>72</td> <td>60</td> <td>10</td> </tr> <tr> <td><b>Time</b></td> <td>15m</td> <td>30s</td> <td>45s</td> <td>45s</td> <td>30s</td> <td>45s</td> <td>45s</td> <td>30s</td> <td>45s</td> <td>45s</td> <td>20m</td> <td>∞</td> </tr> <tr> <td><b>Cycles</b></td> <td></td> <td colspan="3">8x</td> <td colspan="3">30x</td> <td colspan="3">8x</td> <td></td> </tr> </table>            | <b>Temperature</b> | 95   | 95               | 65 - 58<br>(↓10) | 72   | 95   | 58   | 72   | 95   | 53   | 72          | 60   | 10   | <b>Time</b>   | 15m  | 30s  | 45s  | 45s  | 30s  | 45s  | 45s           | 30s  | 45s  | 45s  | 20m  | ∞   | <b>Cycles</b> |  | 8x |  |  | 30x |  |  | 8x |  |  |  |
|              | <b>Temperature</b> |                                                                                                                                                                                                                                                                                                                                                                                                                                                                                                                                                                       | 95                 | 95   | 65 - 58<br>(↓10) | 72               | 95   | 58   | 72   | 95   | 53   | 72   | 60          | 10   |      |               |      |      |      |      |      |      |               |      |      |      |      |     |               |  |    |  |  |     |  |  |    |  |  |  |
|              | <b>Time</b>        |                                                                                                                                                                                                                                                                                                                                                                                                                                                                                                                                                                       | 15m                | 30s  | 45s              | 45s              | 30s  | 45s  | 45s  | 30s  | 45s  | 45s  | 20m         | ∞    |      |               |      |      |      |      |      |      |               |      |      |      |      |     |               |  |    |  |  |     |  |  |    |  |  |  |
|              | <b>Cycles</b>      |                                                                                                                                                                                                                                                                                                                                                                                                                                                                                                                                                                       |                    | 8x   |                  |                  | 30x  |      |      | 8x   |      |      |             |      |      |               |      |      |      |      |      |      |               |      |      |      |      |     |               |  |    |  |  |     |  |  |    |  |  |  |
|              | HTR1A              |                                                                                                                                                                                                                                                                                                                                                                                                                                                                                                                                                                       |                    |      |                  |                  |      |      |      |      |      |      |             |      |      |               |      |      |      |      |      |      |               |      |      |      |      |     |               |  |    |  |  |     |  |  |    |  |  |  |
|              | RSPO2              |                                                                                                                                                                                                                                                                                                                                                                                                                                                                                                                                                                       |                    |      |                  |                  |      |      |      |      |      |      |             |      |      |               |      |      |      |      |      |      |               |      |      |      |      |     |               |  |    |  |  |     |  |  |    |  |  |  |
|              | TCOF1              |                                                                                                                                                                                                                                                                                                                                                                                                                                                                                                                                                                       |                    |      |                  |                  |      |      |      |      |      |      |             |      |      |               |      |      |      |      |      |      |               |      |      |      |      |     |               |  |    |  |  |     |  |  |    |  |  |  |
|              | STMN1              |                                                                                                                                                                                                                                                                                                                                                                                                                                                                                                                                                                       |                    |      |                  |                  |      |      |      |      |      |      |             |      |      |               |      |      |      |      |      |      |               |      |      |      |      |     |               |  |    |  |  |     |  |  |    |  |  |  |
| MSX2         |                    |                                                                                                                                                                                                                                                                                                                                                                                                                                                                                                                                                                       |                    |      |                  |                  |      |      |      |      |      |      |             |      |      |               |      |      |      |      |      |      |               |      |      |      |      |     |               |  |    |  |  |     |  |  |    |  |  |  |
| HINT1        |                    |                                                                                                                                                                                                                                                                                                                                                                                                                                                                                                                                                                       |                    |      |                  |                  |      |      |      |      |      |      |             |      |      |               |      |      |      |      |      |      |               |      |      |      |      |     |               |  |    |  |  |     |  |  |    |  |  |  |
| CLOCK        |                    |                                                                                                                                                                                                                                                                                                                                                                                                                                                                                                                                                                       |                    |      |                  |                  |      |      |      |      |      |      |             |      |      |               |      |      |      |      |      |      |               |      |      |      |      |     |               |  |    |  |  |     |  |  |    |  |  |  |
| HTR2A        |                    |                                                                                                                                                                                                                                                                                                                                                                                                                                                                                                                                                                       |                    |      |                  |                  |      |      |      |      |      |      |             |      |      |               |      |      |      |      |      |      |               |      |      |      |      |     |               |  |    |  |  |     |  |  |    |  |  |  |
| <b>10</b>    | BMP15              | <table border="1"> <tr> <td><b>Temperature</b></td> <td>95</td> <td>95</td> <td>69 - 61<br/>(↓10)</td> <td>72</td> <td>95</td> <td>61</td> <td>72</td> <td>60</td> <td>10</td> </tr> <tr> <td><b>Time</b></td> <td>15 m</td> <td>30 s</td> <td>1 min<br/>30 s</td> <td>45 s</td> <td>30 s</td> <td>45 s</td> <td>45 s</td> <td>20 m</td> <td>∞</td> </tr> <tr> <td><b>Cycles</b></td> <td></td> <td colspan="3">9x</td> <td colspan="3">38x</td> <td></td> <td></td> </tr> </table>                                                                                   | <b>Temperature</b> | 95   | 95               | 69 - 61<br>(↓10) | 72   | 95   | 61   | 72   | 60   | 10   | <b>Time</b> | 15 m | 30 s | 1 min<br>30 s | 45 s | 30 s | 45 s | 45 s | 20 m | ∞    | <b>Cycles</b> |      | 9x   |      |      | 38x |               |  |    |  |  |     |  |  |    |  |  |  |
|              | <b>Temperature</b> |                                                                                                                                                                                                                                                                                                                                                                                                                                                                                                                                                                       | 95                 | 95   | 69 - 61<br>(↓10) | 72               | 95   | 61   | 72   | 60   | 10   |      |             |      |      |               |      |      |      |      |      |      |               |      |      |      |      |     |               |  |    |  |  |     |  |  |    |  |  |  |
|              | <b>Time</b>        |                                                                                                                                                                                                                                                                                                                                                                                                                                                                                                                                                                       | 15 m               | 30 s | 1 min<br>30 s    | 45 s             | 30 s | 45 s | 45 s | 20 m | ∞    |      |             |      |      |               |      |      |      |      |      |      |               |      |      |      |      |     |               |  |    |  |  |     |  |  |    |  |  |  |
|              | <b>Cycles</b>      |                                                                                                                                                                                                                                                                                                                                                                                                                                                                                                                                                                       |                    | 9x   |                  |                  | 38x  |      |      |      |      |      |             |      |      |               |      |      |      |      |      |      |               |      |      |      |      |     |               |  |    |  |  |     |  |  |    |  |  |  |
|              | LYNX2              |                                                                                                                                                                                                                                                                                                                                                                                                                                                                                                                                                                       |                    |      |                  |                  |      |      |      |      |      |      |             |      |      |               |      |      |      |      |      |      |               |      |      |      |      |     |               |  |    |  |  |     |  |  |    |  |  |  |
|              | TSHR B*            |                                                                                                                                                                                                                                                                                                                                                                                                                                                                                                                                                                       |                    |      |                  |                  |      |      |      |      |      |      |             |      |      |               |      |      |      |      |      |      |               |      |      |      |      |     |               |  |    |  |  |     |  |  |    |  |  |  |
| DRD2         |                    |                                                                                                                                                                                                                                                                                                                                                                                                                                                                                                                                                                       |                    |      |                  |                  |      |      |      |      |      |      |             |      |      |               |      |      |      |      |      |      |               |      |      |      |      |     |               |  |    |  |  |     |  |  |    |  |  |  |
| TPH2         |                    |                                                                                                                                                                                                                                                                                                                                                                                                                                                                                                                                                                       |                    |      |                  |                  |      |      |      |      |      |      |             |      |      |               |      |      |      |      |      |      |               |      |      |      |      |     |               |  |    |  |  |     |  |  |    |  |  |  |
| FEV          |                    |                                                                                                                                                                                                                                                                                                                                                                                                                                                                                                                                                                       |                    |      |                  |                  |      |      |      |      |      |      |             |      |      |               |      |      |      |      |      |      |               |      |      |      |      |     |               |  |    |  |  |     |  |  |    |  |  |  |

|           |         |                    |      |      |                  |      |      |      |      |      |      |      |      |    |
|-----------|---------|--------------------|------|------|------------------|------|------|------|------|------|------|------|------|----|
| <b>11</b> | SLC6A4  | <b>Temperature</b> | 95   | 95   | 69 - 61<br>(↓10) | 72   | 95   | 61   | 72   | 60   | 10   |      |      |    |
|           | KRT71   | <b>Time</b>        | 15 m | 30 s | 1 min<br>30 s    | 45 s | 30 s | 45 s | 45 s | 20 m | ∞    |      |      |    |
|           | SLC6A1  | <b>Cycles</b>      | 9x   |      |                  | 38x  |      |      |      |      |      |      |      |    |
|           | HTR1B   |                    |      |      |                  |      |      |      |      |      |      |      |      |    |
| <b>12</b> | KISS1   | <b>Temperature</b> | 95   | 95   | 69 - 62<br>(↓10) | 72   | 95   | 62   | 72   | 95   | 53   | 72   | 60   | 10 |
|           | PAX8    | <b>Time</b>        | 15 m | 30 s | 45 s             | 45 s | 30 s | 45 s | 45 s | 30 s | 45 s | 45 s | 20 m | ∞  |
|           | SERP    | <b>Cycles</b>      | 8x   |      |                  | 30x  |      |      | 8x   |      |      |      |      |    |
|           | DRD3    |                    |      |      |                  |      |      |      |      |      |      |      |      |    |
|           | TSHB    |                    |      |      |                  |      |      |      |      |      |      |      |      |    |
|           | ESR     |                    |      |      |                  |      |      |      |      |      |      |      |      |    |
| FOXE1     |         |                    |      |      |                  |      |      |      |      |      |      |      |      |    |
| <b>13</b> | TSHR A* | <b>Temperature</b> | 95   | 95   | 69 - 62<br>(↓10) | 72   | 95   | 62   | 72   | 95   | 53   | 72   | 60   | 10 |
|           | GHR     | <b>Time</b>        | 15 m | 30 s | 45 s             | 45 s | 30 s | 45 s | 45 s | 30 s | 45 s | 45 s | 20 m | ∞  |
|           | KITLG   | <b>Cycles</b>      | 8x   |      |                  | 30x  |      |      | 8x   |      |      |      |      |    |
|           | MED12   |                    |      |      |                  |      |      |      |      |      |      |      |      |    |
|           | ALB     |                    |      |      |                  |      |      |      |      |      |      |      |      |    |
|           | CALCB   |                    |      |      |                  |      |      |      |      |      |      |      |      |    |
| AVP       |         |                    |      |      |                  |      |      |      |      |      |      |      |      |    |
| <b>14</b> | Amot    | <b>Temperature</b> | 95   | 95   | 65 - 60<br>(↓10) | 72   | 95   | 60   | 72   | 95   | 53   | 72   | 60   | 10 |
|           |         | <b>Time</b>        | 15 m | 30 s | 30 s             | 45 s | 30 s | 30 s | 45 s | 30 s | 30 s | 45 s | 20 m | ∞  |
|           | ext     | <b>Cycles</b>      | 6x   |      |                  | 30x  |      |      | 8x   |      |      |      |      |    |
| <b>15</b> | cryl    | <b>Temperature</b> | 95   | 95   | 67 - 59<br>(↓10) | 72   | 95   | 60   | 72   | 60   | 10   |      |      |    |
|           |         | <b>Time</b>        | 15 m | 30 s | 45 s             | 45 s | 30 s | 30 s | 45 s | 20 m | ∞    |      |      |    |
|           |         | <b>Cycles</b>      | 9x   |      |                  | 38x  |      |      |      |      |      |      |      |    |

Minutes (m), seconds (s).

Table S 2. Genetic variability of 85 microsatellite loci in seven Algerian Rabbit populations

| Locus         | Na | Pa | H <sub>o</sub> ±SE | H <sub>e</sub> ±SE | PIC   | HWE   |
|---------------|----|----|--------------------|--------------------|-------|-------|
| INRACCDDV0101 | 5  | 1  | 0.367±0.025        | 0.418±0.036        | 0.797 | *     |
| INRACCDDV0106 | 5  | 1  | 0.636±0.037        | 0.700±0.005        | 0.695 | *     |
| INRACCDDV0108 | 4  | 0  | 0.468±0.038        | 0.514±0.030        | 0.459 | **    |
| INRACCDDV0139 | 5  | 0  | 0.538±0.052        | 0.611±0.029        | 0.591 | *     |
| INRACCDDV0016 | 5  | 0  | 0.561±0.037        | 0.666±0.019        | 0.662 | *     |
| INRACCDDV0172 | 8  | 3  | 0.551±0.026        | 0.608±0.034        | 0.593 | *     |
| INRACCDDV0176 | 9  | 3  | 0.147±0.030        | 0.183±0.038        | 0.183 | NS    |
| INRACCDDV0203 | 7  | 2  | 0.331±0.054        | 0.560±0.047        | 0.553 | *     |
| INRACCDDV0119 | 7  | 3  | 0.520±0.022        | 0.602±0.014        | 0.575 | *     |
| INRACCDDV0140 | 4  | 0  | 0.514±0.042        | 0.538±0.029        | 0.466 | * *   |
| INRACCDDV0157 | 7  | 2  | 0.336±0.043        | 0.586±0.046        | 0.610 | *     |
| INRACCDDV0201 | 7  | 1  | 0.418±0.037        | 0.495±0.038        | 0.454 | * *   |
| INRACCDDV0087 | 11 | 2  | 0.572±0.045        | 0.817±0.012        | 0.846 | *     |
| INRACCDDV0089 | 5  | 1  | 0.363±0.051        | 0.407±0.046        | 0.390 | * * * |
| Sat3          | 8  | 1  | 0.591±0.041        | 0.611±0.032        | 0.611 | *     |
| Sat4          | 9  | 2  | 0.621±0.063        | 0.731±0.027        | 0.744 | *     |
| Sat5          | 8  | 1  | 0.551±0.041        | 0.584±0.025        | 0.597 | *     |
| Sat7          | 8  | 3  | 0.451±0.039        | 0.544±0.024        | 0.522 | *     |
| Sat8          | 5  | 1  | 0.602±0.023        | 0.630±0.018        | 0.602 | *     |
| INRACCDDV0102 | 9  | 3  | 0.718±0.045        | 0.760±0.014        | 0.754 | *     |
| INRACCDDV0104 | 5  | 0  | 0.536±0.037        | 0.571±0.031        | 0.557 | *     |
| INRACCDDV0169 | 6  | 1  | 0.455±0.044        | 0.506±0.038        | 0.481 | * *   |
| INRACCDDV0192 | 8  | 1  | 0.529±0.041        | 0.577±0.043        | 0.579 | *     |
| INRACCDDV0205 | 16 | 1  | 0.407±0.042        | 0.592±0.032        | 0.601 | *     |
| INRACCDDV0228 | 4  | 0  | 0.414±0.072        | 0.474±0.056        | 0.174 | NS    |
| Sat13         | 6  | 0  | 0.710±0.016        | 0.664±0.015        | 0.642 | *     |
| INRACCDDV0182 | 8  | 4  | 0.461±0.052        | 0.592±0.023        | 0.556 | *     |
| INRACCDDV0185 | 5  | 1  | 0.493±0.053        | 0.525±0.051        | 0.489 | * *   |
| INRACCDDV0259 | 9  | 1  | 0.611±0.034        | 0.674±0.032        | 0.663 | *     |
| INRACCDDV0313 | 9  | 2  | 0.662±0.040        | 0.712±0.037        | 0.727 | *     |
| INRACCDDV0040 | 9  | 3  | 0.626±0.051        | 0.712±0.014        | 0.202 | NS    |
| EDNRA         | 6  | 1  | 0.403±0.043        | 0.483±0.024        | 0.439 | * *   |
| GPR64         | 4  | 0  | 0.585±0.044        | 0.627±0.021        | 0.574 | *     |
| KLH13         | 6  | 0  | 0.228±0.039        | 0.656±0.034        | 0.674 | *     |
| Proc          | 8  | 1  | 0.452±0.037        | 0.551±0.034        | 0.546 | *     |
| ARH           | 3  | 1  | 0.013±0.009        | 0.037±0.024        | 0.038 | NS    |
| CYTC          | 7  | 0  | 0.449±0.022        | 0.656±0.024        | 0.642 | *     |
| HPRT          | 7  | 0  | 0.229±0.038        | 0.569±0.048        | 0.581 | *     |
| mOC342        | 11 | 2  | 0.633±0.033        | 0.748±0.022        | 0.755 | *     |
| AMOT          | 5  | 0  | 0.247±0.037        | 0.553±0.032        | 0.336 | * * * |
| EXT           | 4  | 1  | 0.423±0.037        | 0.513±0.024        | 0.470 | * *   |
| CRYL          | 8  | 2  | 0.451±0.051        | 0.489±0.034        | 0.473 | * *   |
| BC02          | 8  | 2  | 0.617±0.046        | 0.686±0.032        | 0.690 | *     |
| FGF5          | 5  | 1  | 0.413±0.057        | 0.486±0.032        | 0.431 | * *   |
| GH            | 5  | 1  | 0.390±0.063        | 0.377±0.055        | 0.369 | * *   |
| GHRH          | 6  | 0  | 0.429±0.055        | 0.528±0.020        | 0.710 | *     |
| GPC4          | 4  | 1  | 0.020±0.09         | 0.159±0.033        | 0.160 | NS    |
| IGF1          | 5  | 0  | 0.469±0.046        | 0.567±0.025        | 0.511 | *     |
| IGF1R         | 3  | 0  | 0.045±0.019        | 0.043±0.018        | 0.445 | * *   |
| MSTN          | 6  | 0  | 0.424±0.037        | 0.501±0.032        | 0.480 | * *   |
| SOX9          | 3  | 1  | 0.159±0.051        | 0.160±0.041        | 0.156 | NS    |
| TYR           | 7  | 2  | 0.397±0.058        | 0.613±0.035        | 0.593 | *     |
| BDNF          | 6  | 1  | 0.323±0.031        | 0.339±0.030        | 0.328 | * * * |
| CLOCK         | 12 | 3  | 0.698±0.025        | 0.759±0.015        | 0.258 | * * * |
| HINT1         | 14 | 3  | 0.592±0.039        | 0.735±0.022        | 0.746 | *     |

|         |    |   |             |             |       |       |
|---------|----|---|-------------|-------------|-------|-------|
| HTR1A   | 3  | 0 | 0.176±0.046 | 0.327±0.044 | 0.936 | *     |
| HTR2A   | 2  | 1 | 0.000±0.000 | 0.013±0.013 | 0.113 | NS    |
| MSX2    | 7  | 3 | 0.448±0.068 | 0.485±0.037 | 0.444 | * *   |
| RSPO2   | 1  | 0 | 0.000±0.000 | 0.000±0.000 | 0.260 | * * * |
| STMN1   | 4  | 2 | 0.100±0.033 | 0.092±0.030 | 0.192 | NS    |
| TCOF1   | 10 | 2 | 0.665±0.034 | 0.773±0.028 | 0.788 | *     |
| BMP15   | 4  | 1 | 0.132±0.023 | 0.318±0.044 | 0.309 | * * * |
| DRD2    | 7  | 3 | 0.502±0.051 | 0.511±0.040 | 0.466 | * *   |
| FEV     | 5  | 2 | 0.321±0.046 | 0.376±0.040 | 0.155 | NS    |
| LYNX    | 9  | 2 | 0.584±0.035 | 0.758±0.006 | 0.763 | *     |
| TPH2    | 5  | 1 | 0.421±0.046 | 0.561±0.017 | 0.522 | *     |
| TSRH_B  | 4  | 1 | 0.407±0.017 | 0.426±0.017 | 0.354 | * * * |
| HTRB1B  | 4  | 0 | 0.507±0.052 | 0.593±0.025 | 0.544 | *     |
| KRT71   | 10 | 1 | 0.457±0.055 | 0.746±0.017 | 0.770 | *     |
| SLC6A1  | 15 | 3 | 0.499±0.037 | 0.589±0.079 | 0.622 | *     |
| SLC6A4  | 7  | 2 | 0.423±0.044 | 0.482±0.034 | 0.433 | * *   |
| DRD3    | 9  | 5 | 0.449±0.037 | 0.605±0.025 | 0.553 | *     |
| ESR1    | 6  | 0 | 0.560±0.044 | 0.687±0.039 | 0.686 | *     |
| FOXE1   | 4  | 1 | 0.239±0.051 | 0.541±0.024 | 0.465 | * *   |
| KISS1   | 6  | 1 | 0.361±0.047 | 0.379±0.044 | 0.363 | * * * |
| PAX8    | 4  | 0 | 0.046±0.020 | 0.045±0.019 | 0.145 | NS    |
| SERP    | 5  | 1 | 0.275±0.052 | 0.630±0.034 | 0.612 | *     |
| TSHB    | 5  | 1 | 0.485±0.055 | 0.491±0.034 | 0.477 | * *   |
| ALB     | 10 | 0 | 0.722±0.051 | 0.773±0.020 | 0.774 | *     |
| AVP     | 7  | 2 | 0.449±0.052 | 0.458±0.048 | 0.418 | * *   |
| CALCB   | 8  | 2 | 0.458±0.069 | 0.507±0.065 | 0.518 | *     |
| GHR_B   | 5  | 1 | 0.573±0.011 | 0.626±0.013 | 0.599 | *     |
| KITLG_A | 6  | 0 | 0.507±0.036 | 0.677±0.019 | 0.663 | *     |
| MED12_A | 6  | 1 | 0.176±0.023 | 0.541±0.040 | 0.521 | *     |
| TSHR_A  | 6  | 0 | 0.477±0.051 | 0.569±0.023 | 0.512 | *     |

Number of observed alleles per locus ( $N_a$ ), Number of private alleles per locus ( $P_a$ ), mean observed and expected heterozygosity ( $H_o$  and  $H_e$ ), polymorphism information content per locus ( $PIC$ ), significance of Hardy-Weinberg Equilibrium (HWE): \* $P < 0.05$ ; \*\* $P < 0.01$ , \*\*\* $P < 0.001$ , NS: non-significant.
